# Supplementary material for: Chronic Treatment with the 5-HT1A Receptor Partial Agonist Tandospirone Increases Hippocampal Neurogenesis
Source: PubMed Central journal article supplement — Neurol Ther. 2014 Jan 3;3(1):67–77. doi: 10.1007/s40120-013-0015-0 (PMC4381917; doi:10.1007/s40120-013-0015-0), 2014-01-03
Supplement: 40120_2013_15_MOESM1_ESM.pdf [file 40120_2013_15_MOESM1_ESM.pdf]

- The effects of 5-hydroxytryptamine 1A (5-HT1A) receptor partial agonist tandospirone (TDS) on the hippocampal neurogenesis and anxiety behavior were investigated in male Sprague-Dawley rats.
- Chronic treatment with TDS increased the number of doublecortin-positive cells in the dentate gyrus of adult rat hippocampus in a dose-dependent manner.
- Acute treatment with TDS significantly decreased the latency to consume the food pellet in the Novelty Suppressed Feeding test.
- 5-HT1A receptor partial agonists including TDS would be useful and beneficial in the treatment of depressive and anxiety disorder, from the standpoint of hippocampal neurogenesis.

This slide deck represents the opinions of the authors. For a full list of acknowledgments and conflicts of interest for all authors of this article, please see the full text online. Copyright © The Authors 2014. Creative Commons Attribution Noncommercial License (CC BY-NC).
